# Supplementary material for: Mapping Global Urban Impervious Surface and Green Space Fractions Using Google Earth Engine
Source: MDPI journal article supplement (doi:10.3390/rs13204187), 2021-10-19
Supplement: s1 [file s1]

**Table S1.** A summary of global urban land-cover datasets.

| Dataset                                                         | Extent                              | Data Source(s)                                        | Period    | Resolution | Proportion of Global Land Area              | Accuracy                                        |
|-----------------------------------------------------------------|-------------------------------------|-------------------------------------------------------|-----------|------------|---------------------------------------------|-------------------------------------------------|
| Global constructed impervious surface area (ISA) [1]            | Constructed ISA                     | DMSP/OLS LandScan 2004                                | 2000–2001 | 1 km       | 0.43% in 2001                               | --                                              |
| Global urban extent [2,3]                                       | Built-up area (excludes parks)      | MODIS                                                 | 2001–2002 | 500 m      | 0.51% in 2002                               | OA is 93%; R <sup>2</sup> is 0.90               |
| Global human built-up and settlement extent (HBASE) dataset [4] | Built-up area                       | Landsat TM/ETM                                        | 2011–2013 | 0.5–10 m   | —                                           | OA is 86.6%                                     |
| Global Human Settlement Layer (GHSL) [5, 6]                     | Urban centers/ clusters             | Multiple sources                                      | 1975–2018 | 0.5–10 m   | —                                           | OA > 90%                                        |
| Global 1-km annual urban dynamics [7]                           | Built-up area                       | DMSP/OLS 1 km                                         | 1992–2013 | 1 km       | 0.53% in 2013                               | R <sup>2</sup> is 0.89 in China and 0.95 in USA |
| Global urban land (GUL) [8]                                     | ISA                                 | Landsat TM/ETM                                        | 1990–2010 | 30 m       | 0.63% in 2010                               | Kappa is 0.43–0.50                              |
| Global urban ISA and green space [9]                            | Urban ISA and green space fractions | DMSP/OLS, MODIS and GlobeLand30                       | 2015      | 250 m      | 0.30% (ISA) and 0.17% (green space) in 2010 | MRE is 0.19                                     |
| Global urban expansion (GUE) [10]                               | Built-up area                       | DMSP/OLS, MODIS NDVI, and LST                         | 1992–2016 | 1 km       | 0.42% in 2016                               | OA is 90.0%; Kappa is 0.47                      |
| Global urban boundaries [11]                                    | Built-up area                       | GAIA                                                  | 1990–2018 | 30 m       | 0.54% in 2018                               | R > 0.8                                         |
| Global artificial impervious area (GAIA) [12]                   | Artificial ISA                      | Landsat TM/ETM/8; Sentinel-1 Synthetic Aperture Radar | 1985–2015 | 30 m       | 0.53% in 2015                               | Kappa is 0.78 in 2015                           |

|                                                      |                      |                                          |           |      |                                     |                                   |
|------------------------------------------------------|----------------------|------------------------------------------|-----------|------|-------------------------------------|-----------------------------------|
| Global ISA (MSMT) [13]                               | ISA                  | Landsat 8/<br>Sentinel-1<br>SAR/SRTM DEM | 2015      | 30 m | —                                   | OA is 95.1%;<br>Kappa is 0.90     |
| World Settlement<br>Footprint 2015<br>(WSF2015) [14] | Human<br>settlements | Sentinel-1/<br>Landsat 8                 | 2015      | 10 m | 0.95% of the<br>emerged<br>surfaces | AA is<br>89.33%;<br>Kappa is 0.78 |
| Urban Footprint<br>Processor(UFP)[15]                | Human<br>settlements | TanDEM-X/<br>TerraSAR-X                  | 2011–2012 | 12 m | —                                   | OA is<br>85.04%;<br>Kappa is 0.69 |

**Table S2.** The thresholds for mapping urban boundaries in each urban ecoregion.

| ID | Urban ecoregions                       | Sampled cities                                                       | Samples | Threshold |
|----|----------------------------------------|----------------------------------------------------------------------|---------|-----------|
| 1  | Temperate forest                       | Houston, New York, Richmond,<br>Miami, Brisbane, Canberra,<br>Sydney | 825     | 40        |
| 2  | Temperate forest                       | Aberdeen, Bergen, Budapest,<br>London, Moscow, Warsaw                | 1030    | 40        |
| 3  | Temperate forest                       | Anqing, Beijing, Chengdu,<br>Shenyang, Tokyo, Zhengzhou              | 446     | 50        |
| 4  | Temperate grassland                    | Albuquerque, Las Vegas, Phoenix                                      | 539     | 40        |
| 5  | Temperate grassland                    | Baku, Baghdad, Kayseri, Tehran                                       | 515     | 50        |
| 6  | Tropical broadleaf<br>forest           | Havana, Manaus                                                       | 474     | 35        |
| 7  | Tropical broadleaf<br>forest           | Bata, Lagos                                                          | 119     | 35        |
| 8  | Tropical,<br>sub-tropical forest       | Guangzhou, Hue, Kuala Lumpur,<br>Mandalay                            | 653     | 50        |
|    |                                        | New Deli, Pondicherry                                                | 251     | 45        |
| 9  | Tropical,<br>sub-tropical<br>savannah  | Brasilia, Buenos Aires Curitiba,<br>Rio de Janeiro                   | 599     | 35        |
| 10 | Tropical,<br>sub-tropical<br>savannah  | Addis Ababa, Bamako                                                  | 716     | 50        |
| 11 | Tropical,<br>sub-tropical<br>grassland | Lima, Cape Town                                                      | 187     | 35        |
| 12 | Temperate<br>Mediterranean             | Casablanca, Istanbul, Madrid, Los<br>Angeles                         | 427     | 40        |
| 13 | Arid, semi-arid<br>desert              | Aswan, Cairo, Kuwait City, Sana                                      | 642     | 50        |
| 14 | Arid, semi-arid<br>steppe              | Aksu, Almay, Lhasa, Urumqi                                           | 557     | 50        |
| 15 | Boreal forest, tundra                  | Fairbanks, Yakutsk                                                   | 450     | 35        |

**Table 3.** The values of Normalized Difference Vegetation Index (vegetation) (NDVI<sub>veg</sub>), Normalized Difference Vegetation Index (soil) (NDVI<sub>soil</sub>), the slope in the linear regression between  $FVC_i$  and  $NGSI_i$  in each urban ecoregion ( $\beta$ ), and impervious surface area (ISA) and green space (GS) fractions in each urban ecoregion.

| ID | Urban ecoregion                  | NDVI <sub>veg</sub> | NDVI <sub>soil</sub> | $\beta$ | ISA fraction | GS fraction |
|----|----------------------------------|---------------------|----------------------|---------|--------------|-------------|
| 1  | Temperate forest                 | 64                  | 34                   | 0.9111  | 56.65%       | 39.34%      |
| 2  | Temperate forest                 | 64                  | 25                   | 0.9117  | 61.37%       | 29.60%      |
| 3  | Temperate forest                 | 65                  | 23                   | 0.9362  | 64.32%       | 27.04%      |
| 4  | Temperate grassland              | 54                  | 18                   | 0.7974  | 65.50%       | 31.05%      |
| 5  | Temperate grassland              | 62                  | 24                   | 0.6409  | 60.27%       | 28.28%      |
| 6  | Tropical broadleaf forest        | 66                  | 24                   | 0.6520  | 61.89%       | 30.87%      |
| 7  | Tropical broadleaf forest        | 48                  | 27                   | 0.7293  | 45.42%       | 49.38%      |
| 8  | Tropical, sub-tropical forest    | 56                  | 30                   | 0.9785  | 60.73%       | 30.30%      |
| 9  | Tropical, sub-tropical savannah  | 54                  | 26                   | 0.7792  | 66.11%       | 29.21%      |
| 10 | Tropical, sub-tropical savannah  | 48                  | 17                   | 1.0258  | 55.23%       | 38.36%      |
| 11 | Tropical, sub-tropical grassland | 46                  | 29                   | 0.7333  | 62.55%       | 29.99%      |
| 12 | Temperate Mediterranean          | 59                  | 20                   | 0.8307  | 56.42%       | 39.10%      |
| 13 | Arid, semi-arid desert           | 64                  | 31                   | 0.9214  | 54.52%       | 30.26%      |
| 14 | Arid, semi-arid steppe           | 67                  | 23                   | 0.8095  | 60.99%       | 26.54%      |
| 15 | Boreal forest, tundra            | 64                  | 34                   | 0.7598  | 38.94%       | 57.48%      |

## References

1. Elvidge, C.D.; Tuttle, B.T.; Sutton, P.S.; Baugh, K.E.; Howard, A.T.; Milesi, C.; Bhaduri, B.L.; Nemani, R. Global distribution and density of constructed impervious surfaces. *Sensors* **2007**, *7*, 1962–1979.
2. Schneider, A.; Friedl, M.A.; Potere, D. A new map of global urban extent from MODIS satellite data. *Environ. Res. Lett.* **2009**, *4*, 044003.
3. Schneider, A.; Friedl, M.A.; Potere, D. Mapping global urban areas using MODIS 500 m data: new methods and datasets based on “urban ecoregions.” *Remote Sens. Environ.* **2010**, *114*, 1733–1746.
4. Wang, P.S.; Huang, C.Q.; Brown de Colstoun, E.C.; Tilton J.C.; Tan, B. Global Human Built-up and Settlement Extent (HBASE) Dataset from Landsat. NASA Socioeconomic Data and Applications Center (SEDAC); Palisades, NY. 2017. <https://doi.org/10.7927/H4DN434S>.
5. Pesaresi, M.; Huadong, G.; Blaes, X.; Ehrlich, D.; Ferri, S.; Gueguen, L.; Halkia, M.; Kauffmann, M.; Kemper, T.; Lu, L.; Marin-Herrera, M.A.; Ouzonis, G.K.; Scavazzon, M.; Soille, P.; Syrris, V.; Zanchetta, L. A global human settlement layer from optical HR/VHR RS data: concept and first results. *IEEE J. Sel. Top. Appl. Earth Obs. Remote Sens.* **2013**, *6*, 2102–2131.
6. Kemper, T.; Corban, C.; Ehrlich, D.; Florczyk, A.; Carneiro Freire, S.; Maffenini, L.; Melchiorri, M.; Politis, P.; Schiavina, M.; Pesaresi, M.; Soille, P.; Syrris, V. GHS built-up grid, derived from Landsat, multitemporal (1975, 1990, 2000, 2014), IR2017 V1.0, European Commission, 2017, JRC109041.

7. Zhou, Y.Y.; Li, X.C.; Asrar, G.R.; Smith, S.J.; Imhoff, M. A global record of annual urban dynamics (1992–2013) from nighttime lights. *Remote Sens. Environ.* **2018**, *219*, 206–220.
8. Liu, X.P.; Hu, G.H.; Chen, Y.M.; Li, X.; Xu, X.C.; Li, S.Y.; Pei, F.S.; Wang, S.J. High-resolution multi-temporal mapping of global urban land using Landsat images based on the Google Earth Engine Platform. *Remote Sens. Environ.* **2018**, *209*, 227–239.
9. Kuang, W.H. Mapping global impervious surface area and green space within urban environments. *Sci. China Earth Sci.* **2019**, *62*, 1591–1606.
10. He, C.Y.; Liu, Z.F.; Gou, S.Y.; Zhang, Q.F.; Zhang, J.S.; Xu, L.L. Detecting global urban expansion over the last three decades using a fully convolutional network. *Environ. Res. Lett.* **2019**, *14*, 034008.
11. Li, X.C.; Gong, P.; Zhou, Y.Y.; Wang, J.; Bai, Y.Q.; Chen, B.; Hu, T.; Xiao, Y.X.; Xu, B.; Yang, J.; Liu, X.P.; Cai, W.J.; Huang, H.B.; Wu, T.H.; Wang, X.; Lin, P.; Li, X.; Chen, J.; He, C.Y.; Li, X.; Yu, L.; Clinton, N.; Zhu, Z. Mapping global urban boundaries from the global artificial impervious area (GAIA) data. *Environ. Res. Lett.* **2020**, *15*, 094044.
12. Gong, P.; Li, X.C.; Wang, J.; Bai, Y.; Chen, B.; Hu, T.; Liu, X.; Xu, B.; Yang, J.; Zhang, W.; Zhou, Y. Annual maps of global artificial impervious area (GAIA) between 1985 and 2018. *Remote Sens. Environ.* **2020**, *236*, 111510.
13. Zhang, X.; Liu, L.Y.; Wu, C.S.; Chen, X.D.; Gao, Y.; Xie, S.; Zhang, B. Development of a global 30 m impervious surface map using multisource and multitemporal remote sensing datasets with the Google Earth Engine platform. *Earth Syst. Sci. Data* **2020**, *12*, 1625–1648.
14. Marconcini, M.; Metz-Marconcini, A.; Üreyen, S.; Palacios-Lopez D.; Hanke, W.; Bachofer, F.; Zeidler, J.; Esch, T.; Gorelick, N.; Kakarla, A.; Paganini, M.; Strano, E. Outlining where humans live, the World Settlement Footprint 2015. *Sci. Data* **2020**, *7*, 242.
15. Esch, T.; Heldens, W.; Hirner, A.; Keil, M.; Marconcini, M.; Roth, A.; Zeidler, J.; Dech, S.; Strano, E. Breaking new ground in mapping human settlements from space: the Global Urban Footprint. *ISPRS J. Photogramm. Rem. Sens.* **2017**, *134*, 30–42.
